# Supplementary material for: E6 and E7 gene polymorphisms in human papillomavirus Type-6 identified in Southwest China
Source: Springer Nature journal article supplement (doi:10.1186/s12985-019-1221-x), 2019-09-12

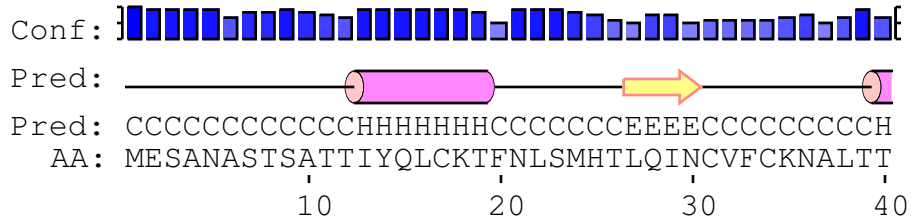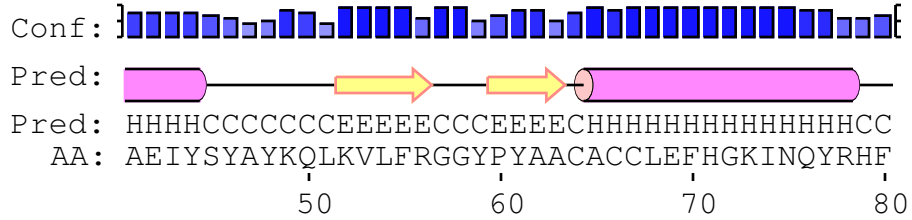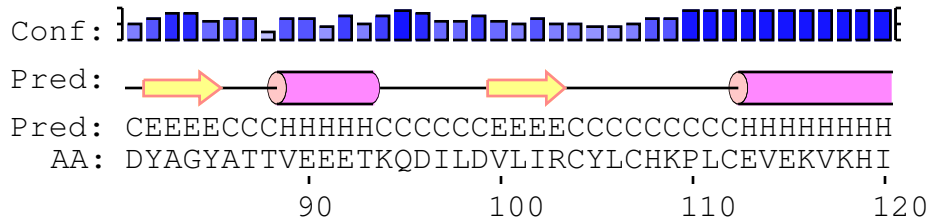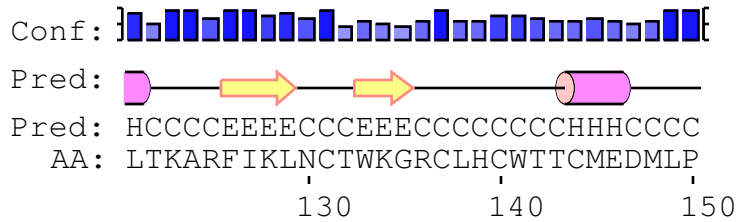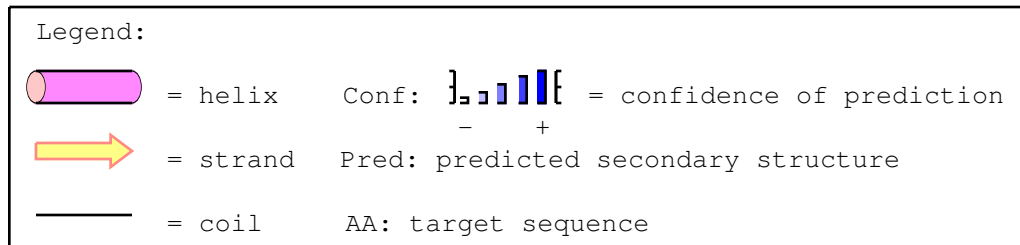

Supplement: MOESM3 [file 17166150]
